# Supplementary material
Source: MDPI journal article supplement (https://www.mdpi.com/2304-6740/7/11/129)
Supplement: s1 [file s1]

# Supplementary Materials: Reaction of Dialumane Incorporating Bulky Eind Groups with Pyridines

Takahiro Murosaki, Ryoma Ohno, Tomohiro Agou, Daisuke Hashizume and Tsukasa Matsuo

## NMR Spectra of 2, 3, 4, 5-*d*<sub>6</sub>, and 1-*d*<sub>4</sub>

Py → AlH<sub>2</sub>(Eind) (2): Figures S1 and S2;

Py → AlH(1,4-dihydropyrid-1-yl)(Eind) (3): Figures S3 and S4;

PPy → AlH<sub>2</sub>(Eind) (4): Figures S5 and S6;

[Li(OEt<sub>2</sub>)]<sub>2</sub>[(Eind)AlD<sub>3</sub>]<sub>2</sub> (5-*d*<sub>6</sub>): Figures S7–S10;

(Eind)DAI(*m*-D)2AlD(Eind) (1-*d*<sub>4</sub>): Figures S11–S14.

## <sup>1</sup>H NMR Spectra of the Reaction Mixture of 1-*d*<sub>4</sub> and Py in C<sub>6</sub>H<sub>6</sub> at 20 °C

After 22 h: Figure S15;

After 5 days: Figure S16;

After 11 days: Figure S17;

And after 27 days: Figure S18.

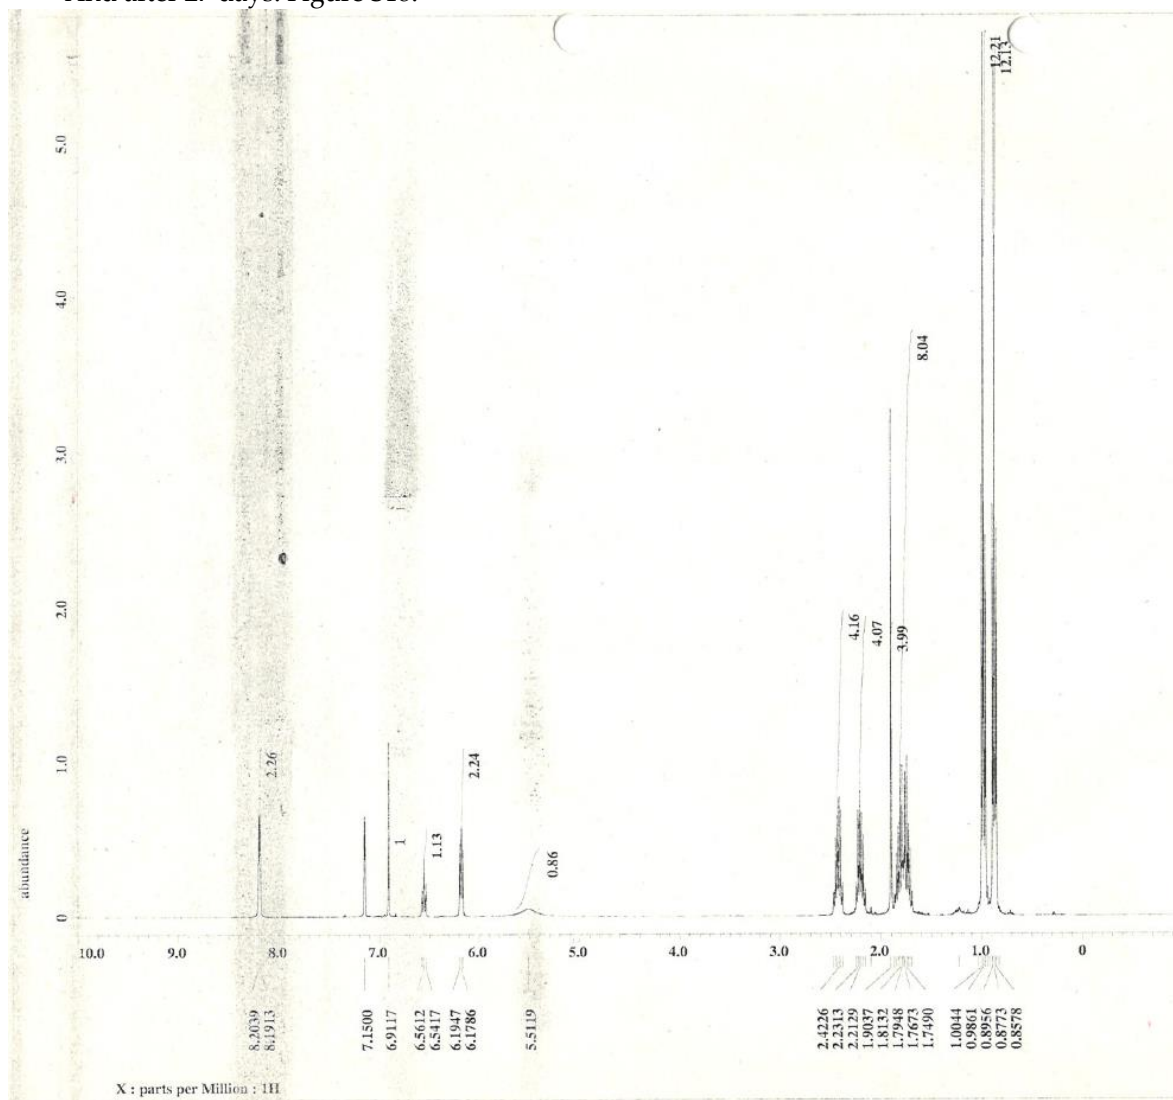

Figure S1. <sup>1</sup>H NMR spectrum of 2 in C<sub>6</sub>D<sub>6</sub> at 20 °C.

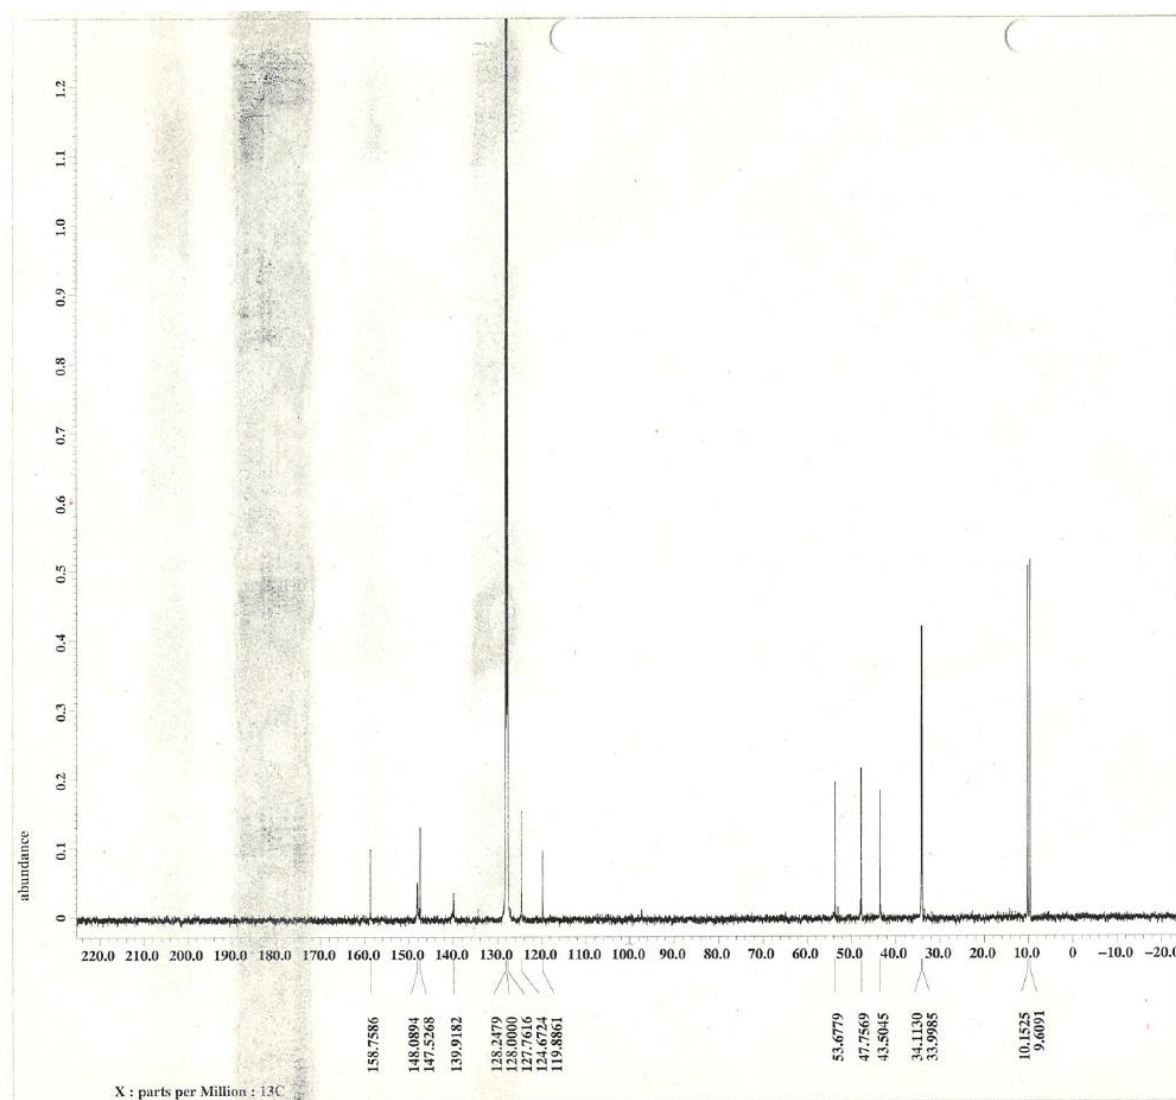

**Figure S2.**  $^{13}\text{C}$  NMR spectrum of **2** in  $\text{C}_6\text{D}_6$  at  $20^\circ\text{C}$ .

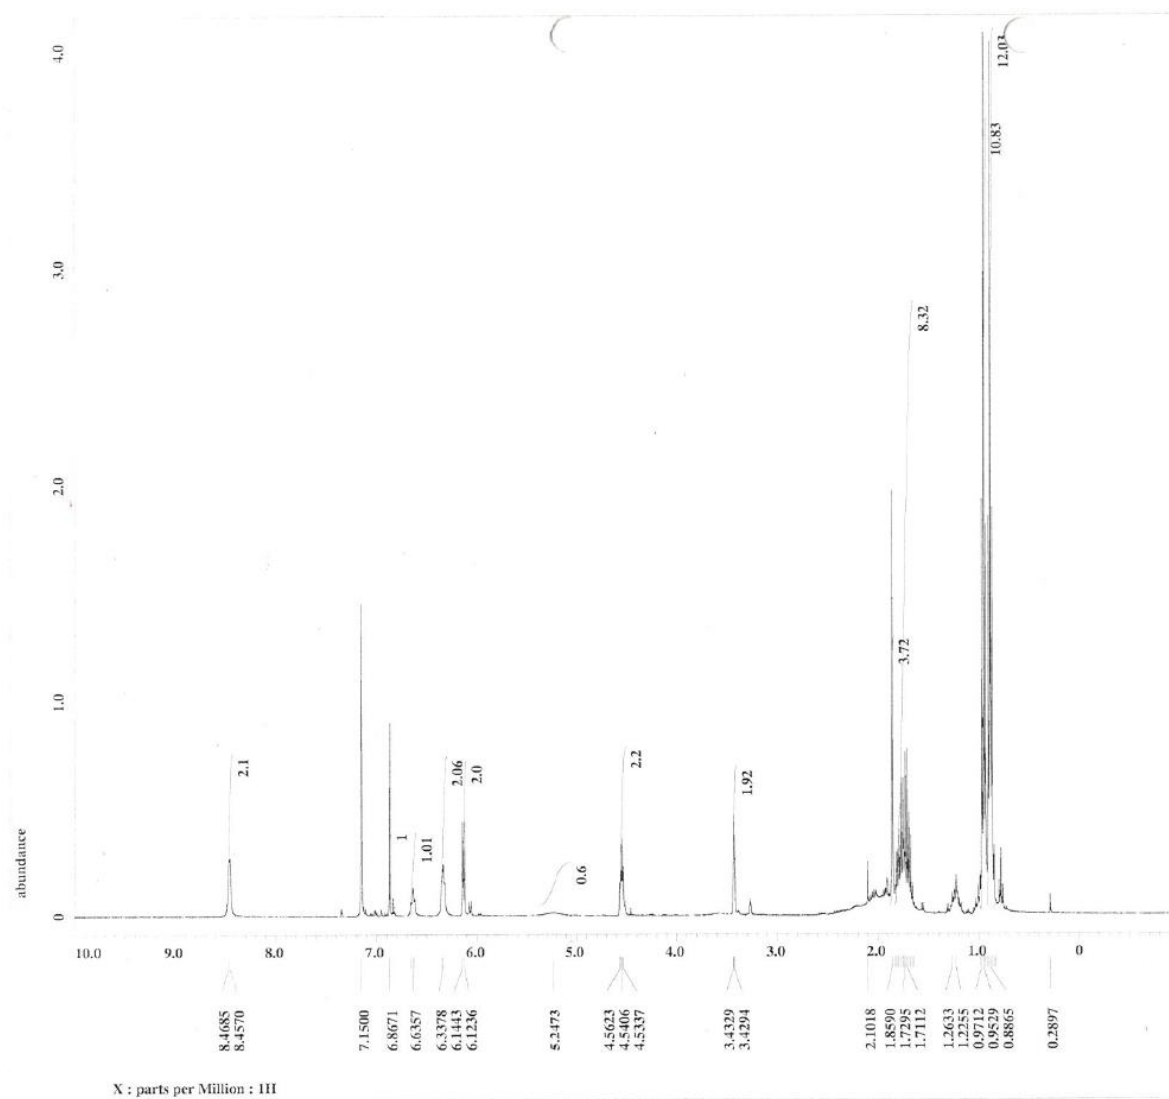

**Figure S3.**  $^1\text{H}$  NMR spectrum of **3** in  $\text{C}_6\text{D}_6$  at  $20^\circ\text{C}$ .

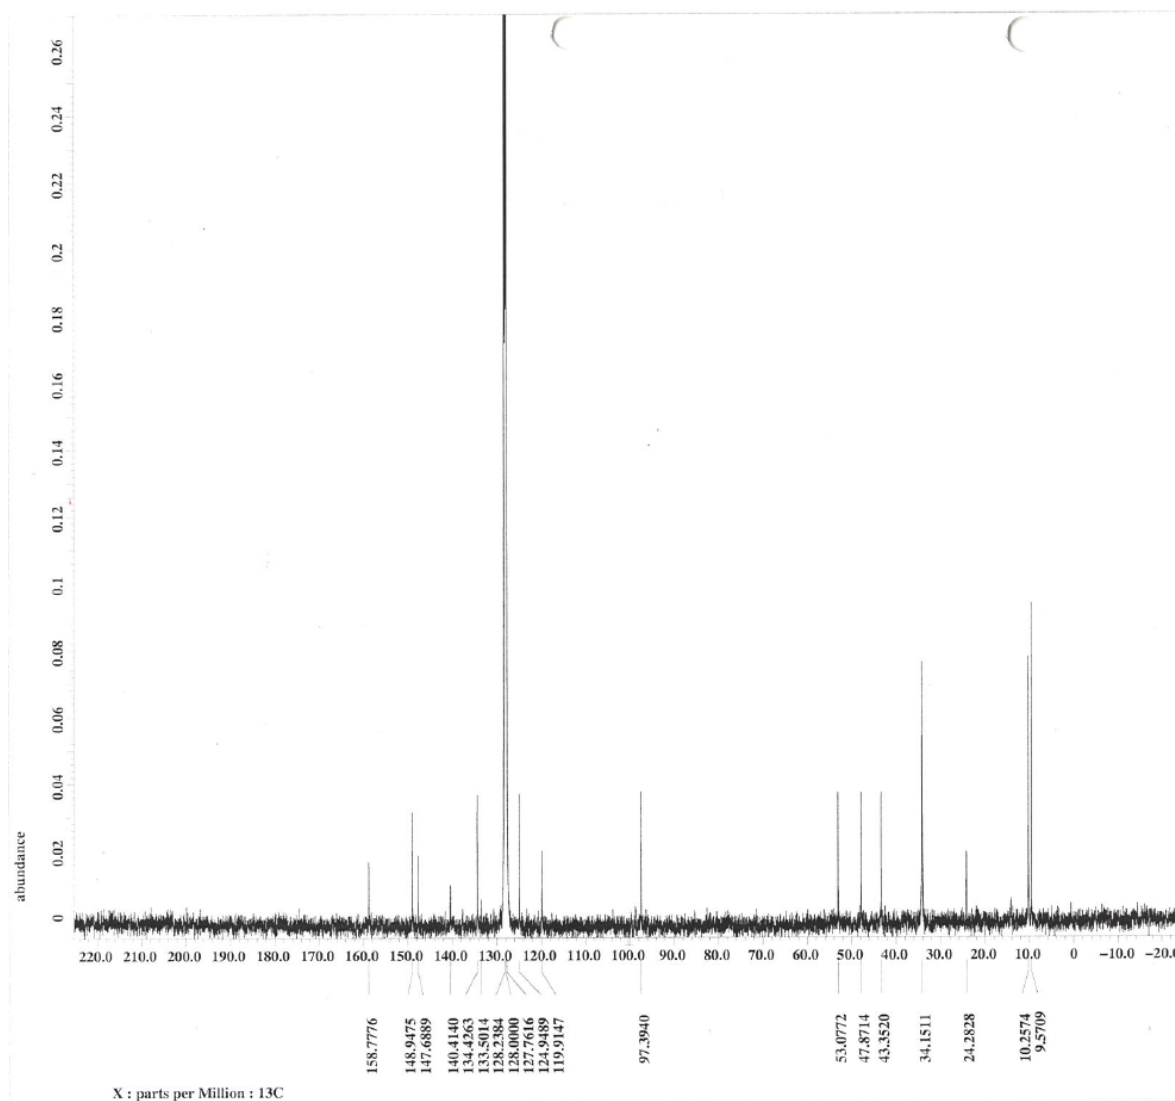

**Figure S4.** <sup>13</sup>C NMR spectrum of **3** in C<sub>6</sub>D<sub>6</sub> at 20 °C.

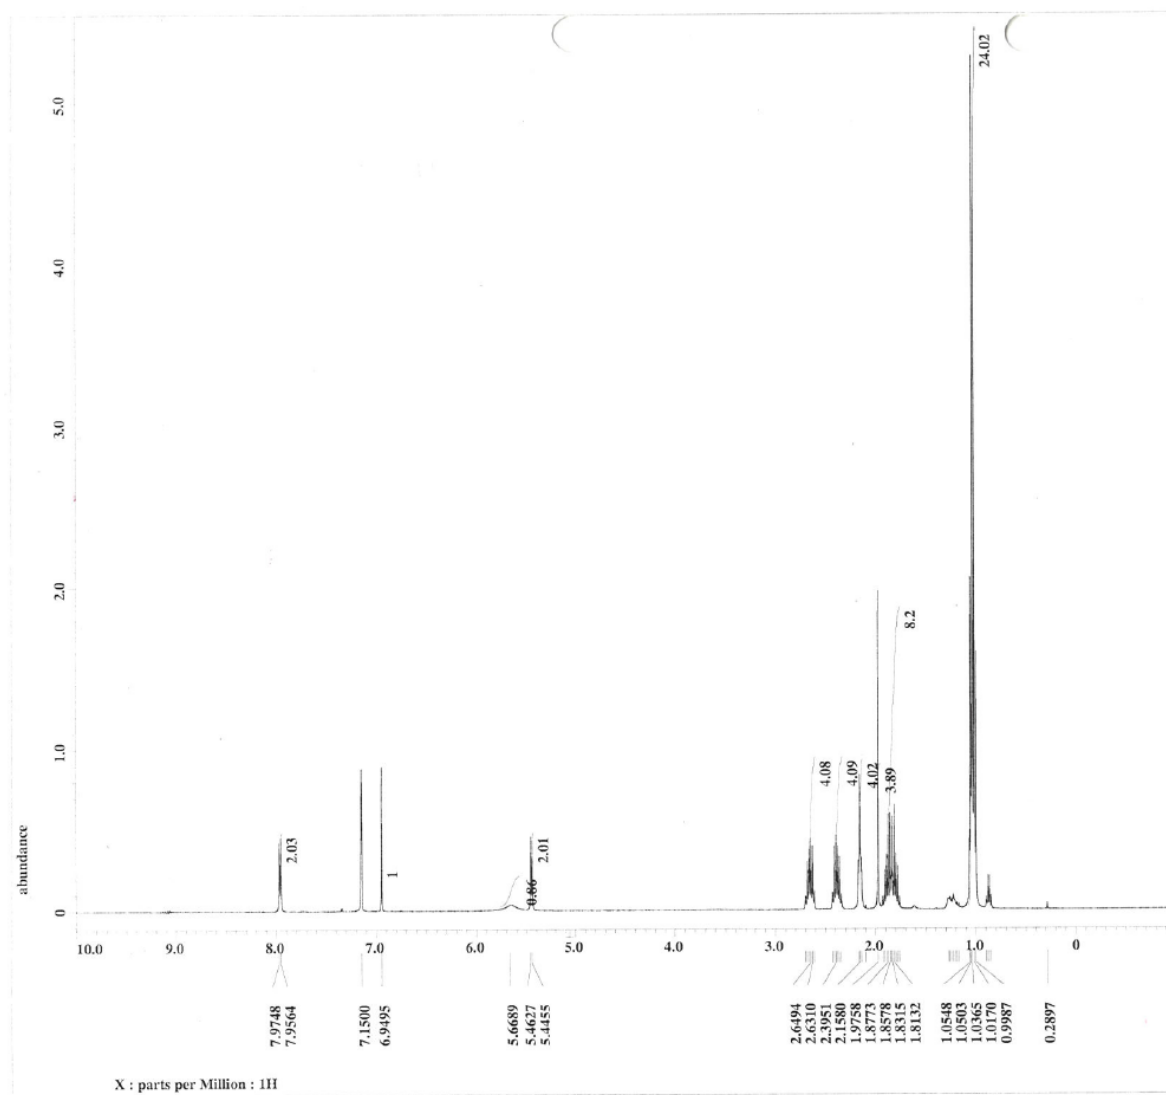

Figure S5.  $^1\text{H}$  NMR spectrum of 4 in  $\text{C}_6\text{D}_6$  at  $20^\circ\text{C}$ .

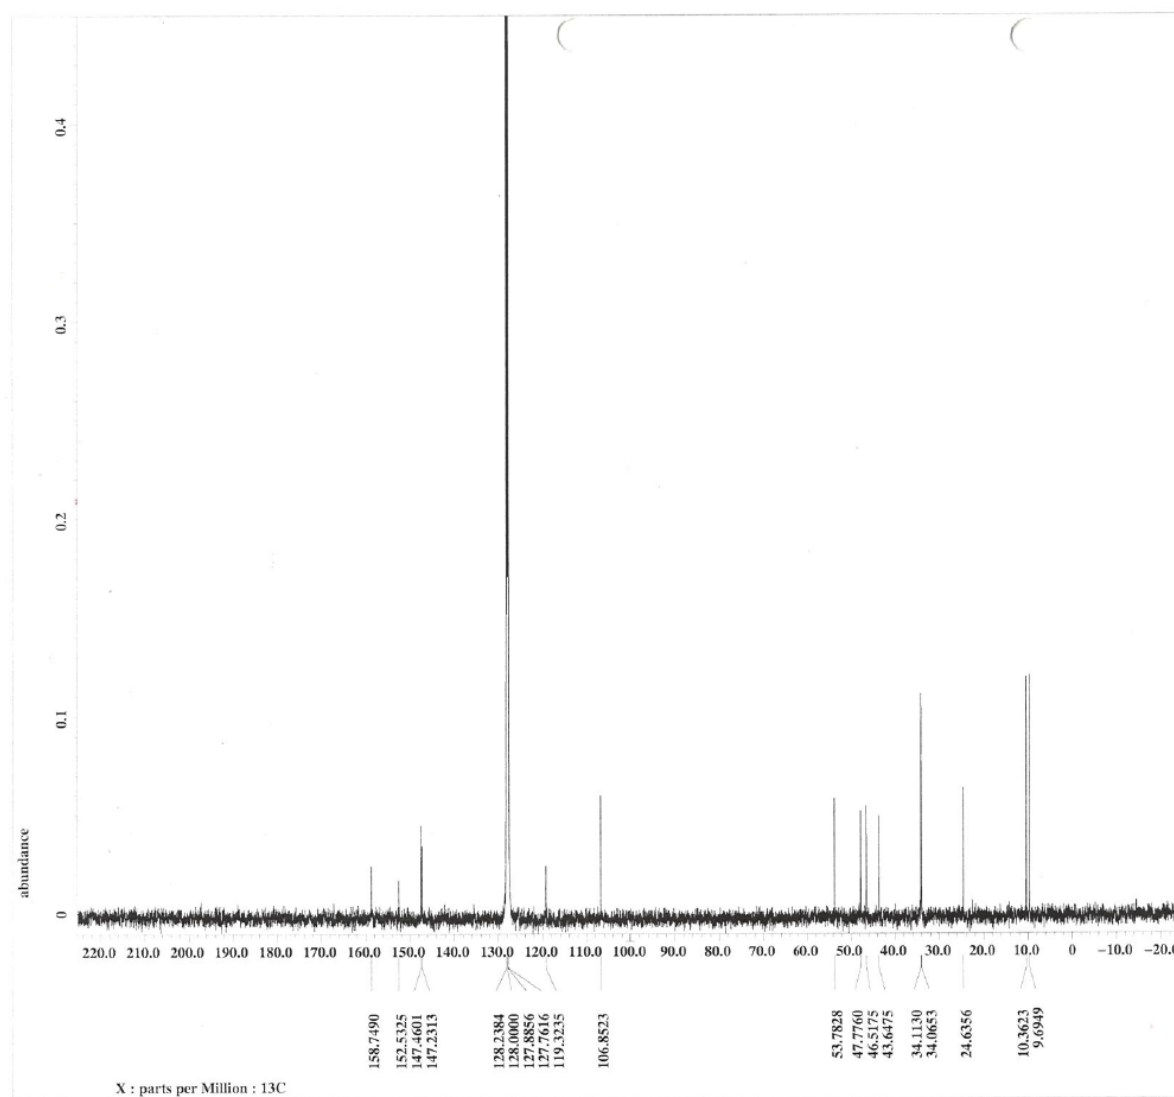

**Figure S6.**  $^{13}\text{C}$  NMR spectrum of **4** in  $\text{C}_6\text{D}_6$  at 20  $^\circ\text{C}$ .

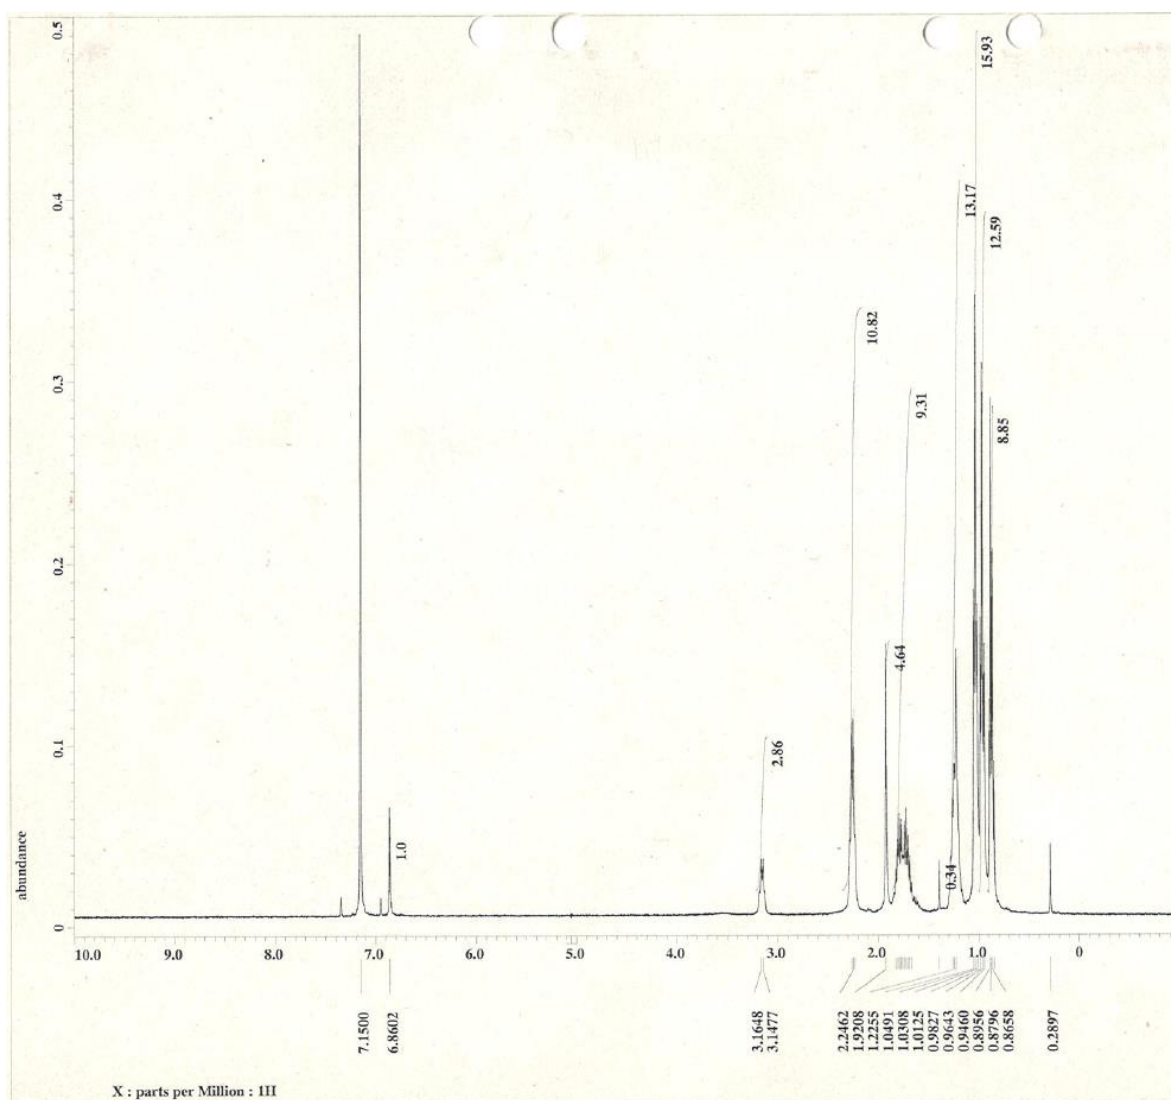

Figure S7.  $^1\text{H}$  NMR spectrum of  $5\text{-}d_6$  in  $\text{C}_6\text{D}_6$  at  $20^\circ\text{C}$ .

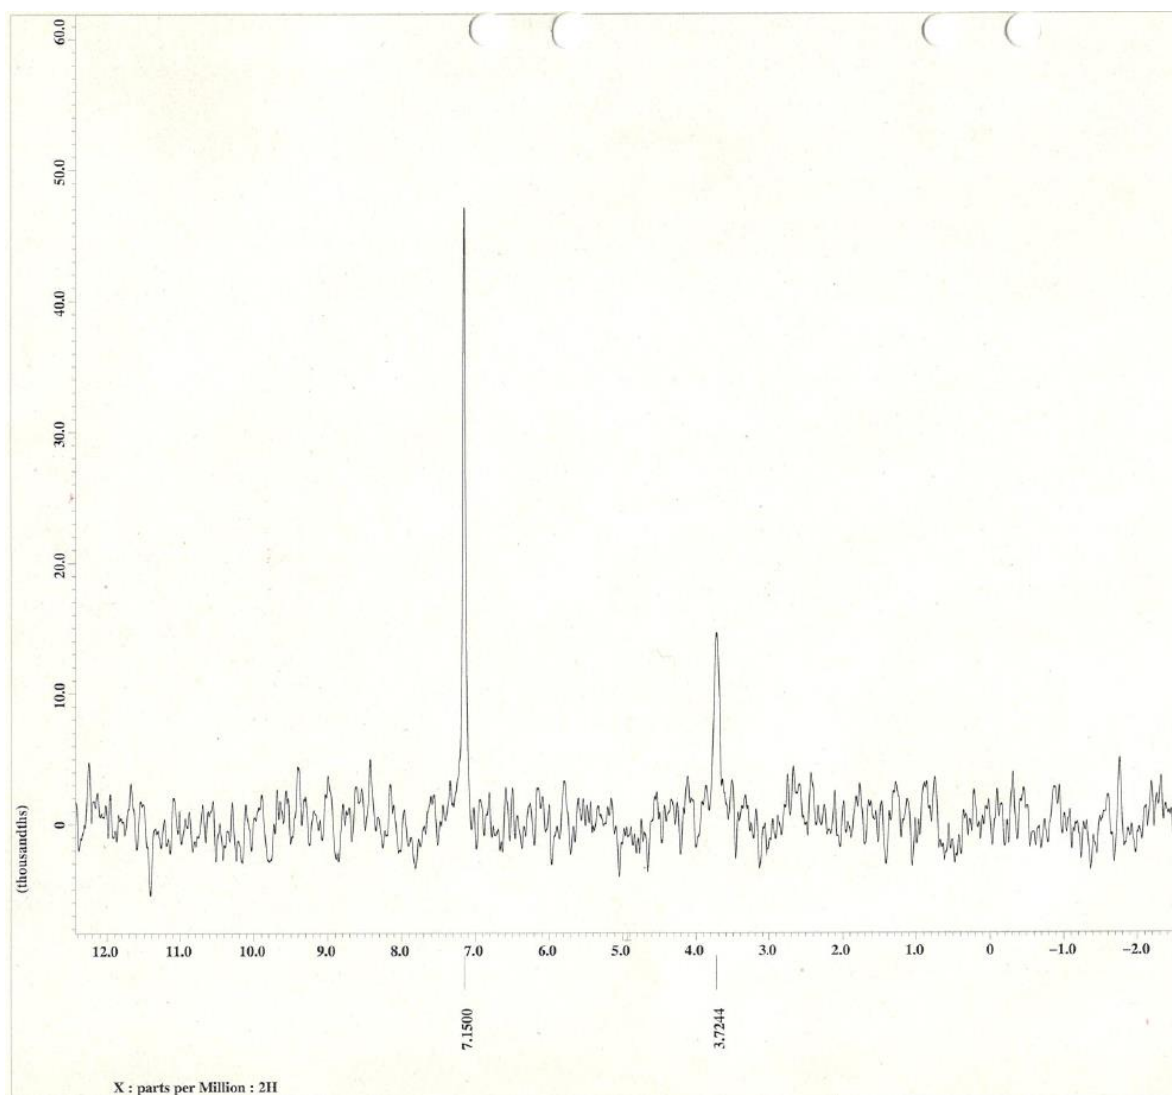

Figure S8.  $^2\text{H}$  NMR spectrum of  $5\text{-d}_6$  in  $\text{C}_6\text{H}_6$  at  $20^\circ\text{C}$ .



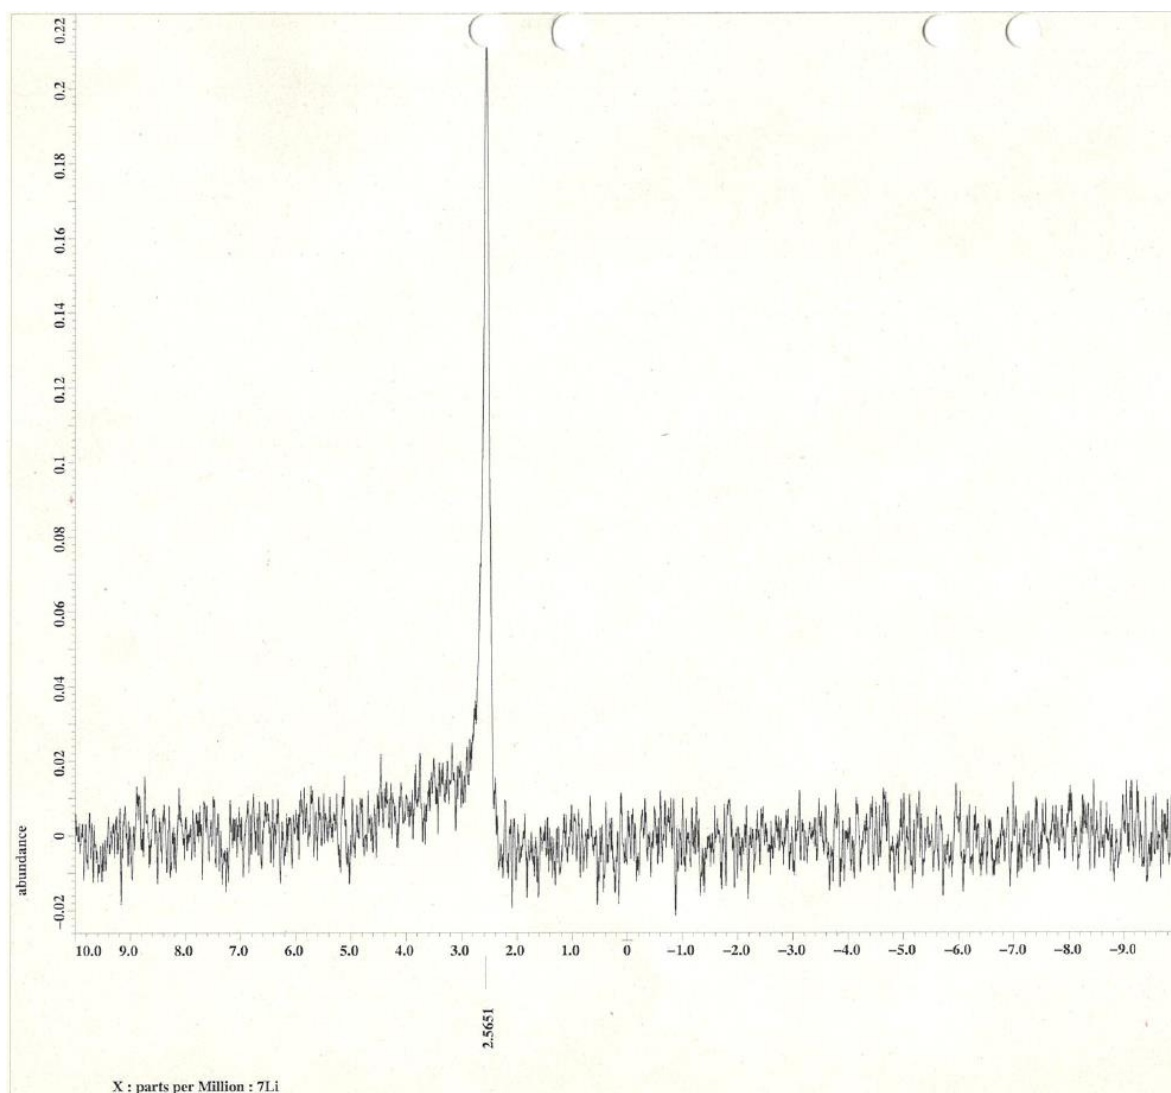

**Figure S9.**  ${}^7\text{Li}$  NMR spectrum of 5- $d_6$  in  $\text{C}_6\text{D}_6$  at 20 °C.

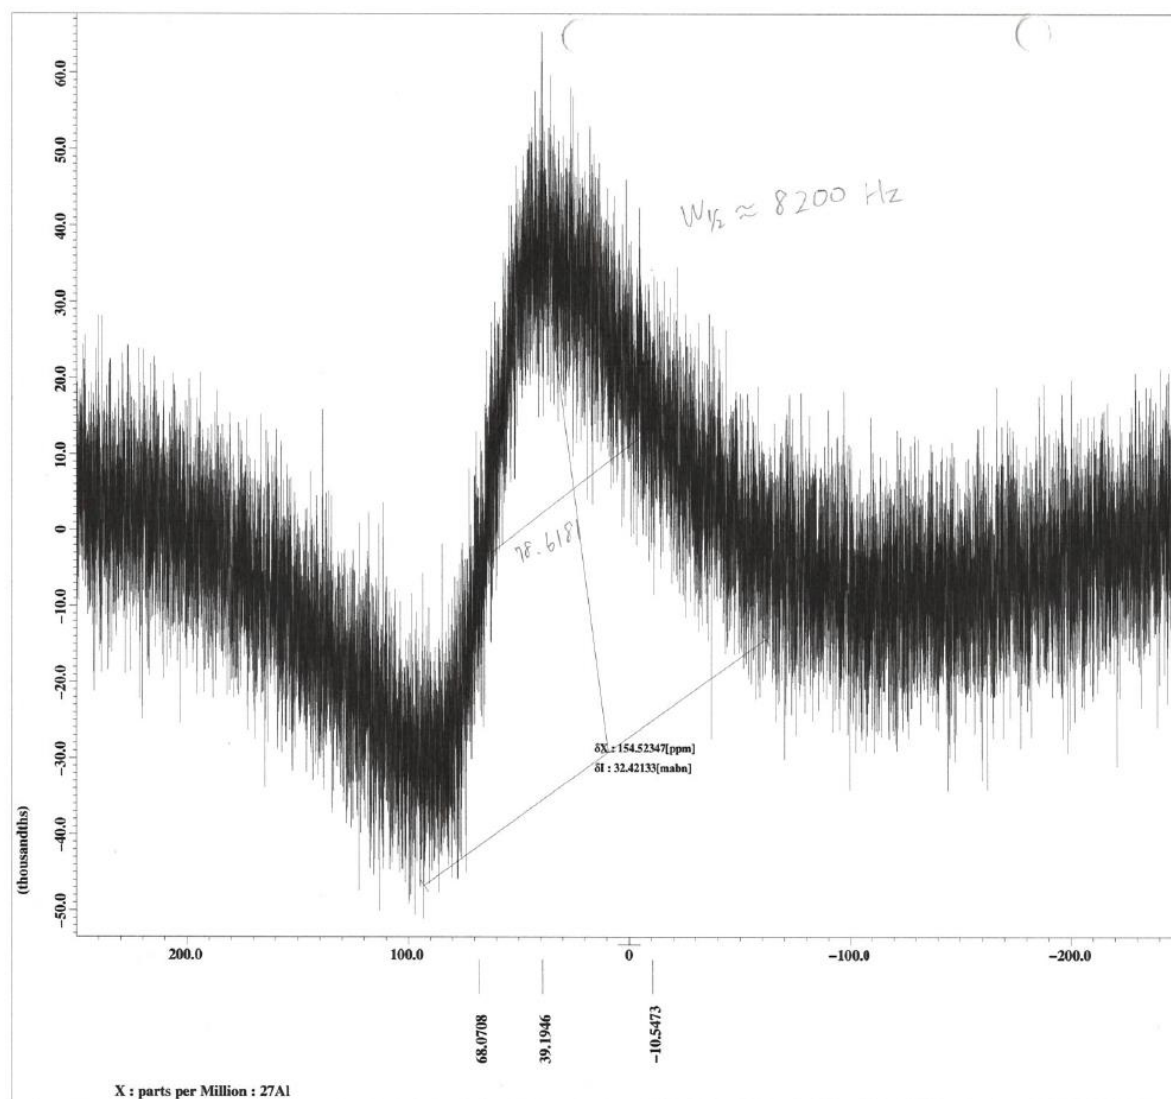

Figure S10.  $^{27}\text{Al}$  NMR spectrum of 5- $d_6$  in  $\text{C}_6\text{D}_6$  at 20 °C.

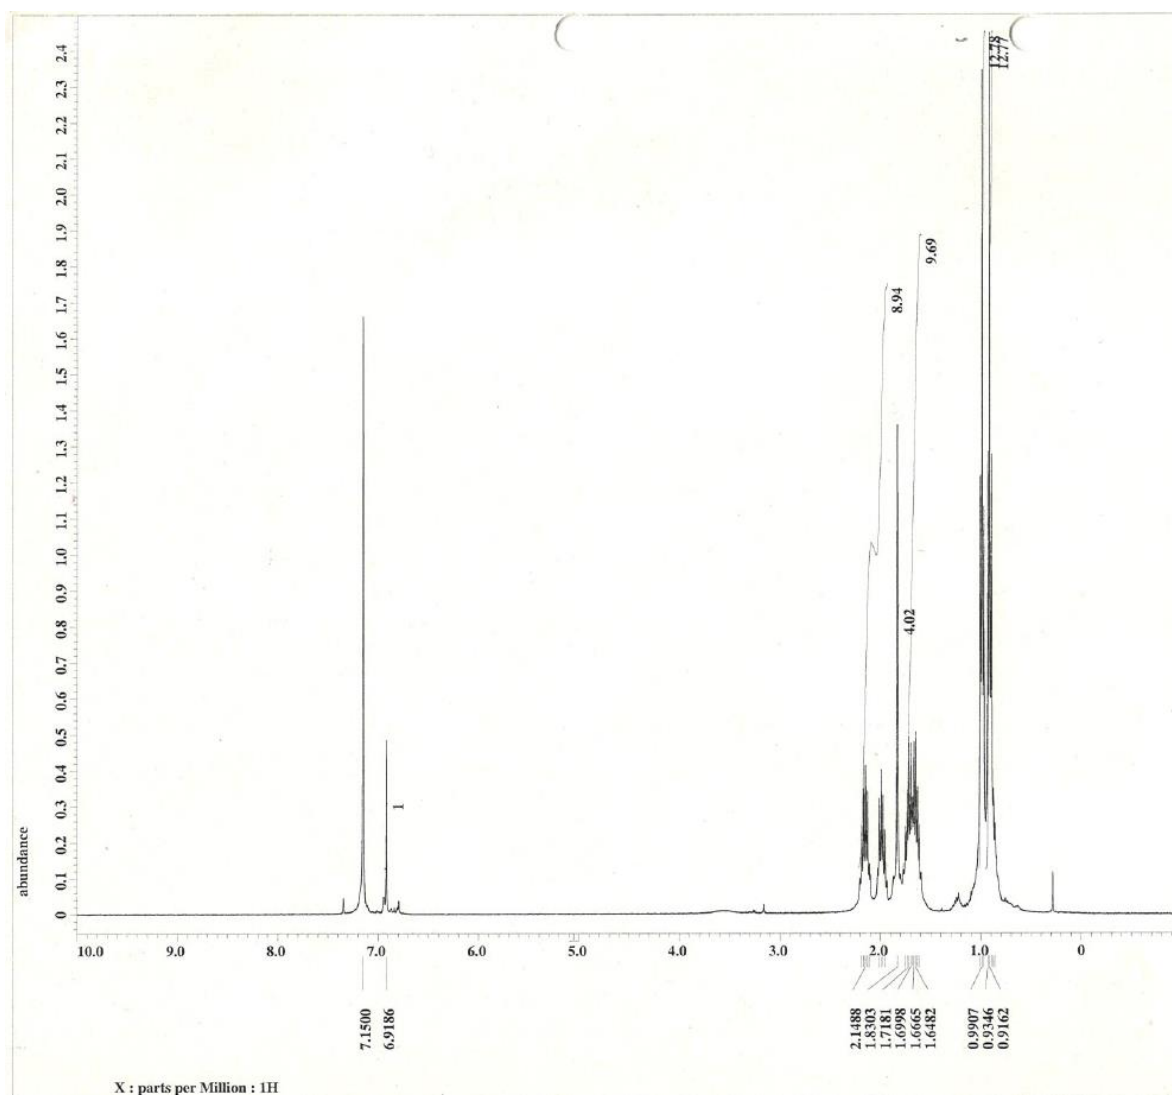

**Figure S11.**  $^1\text{H}$  NMR spectrum of  $1\text{-}d_4$  in  $\text{C}_6\text{D}_6$  at  $20^\circ\text{C}$ .

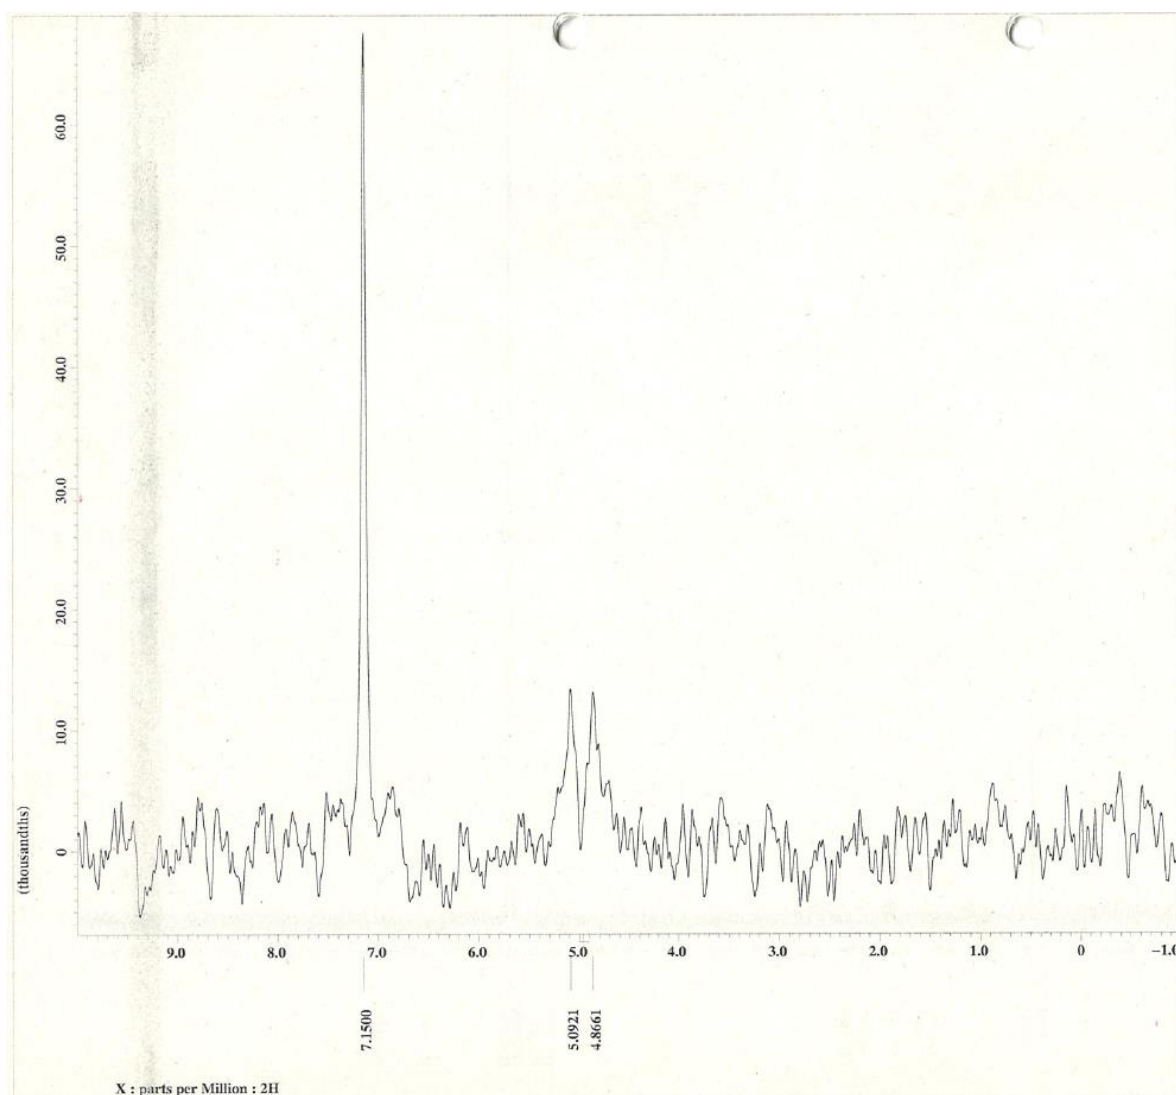

**Figure S12.**  $^2\text{H}$  NMR spectrum of **1-*d*<sub>4</sub>** in  $\text{C}_6\text{H}_6$  at 20 °C.

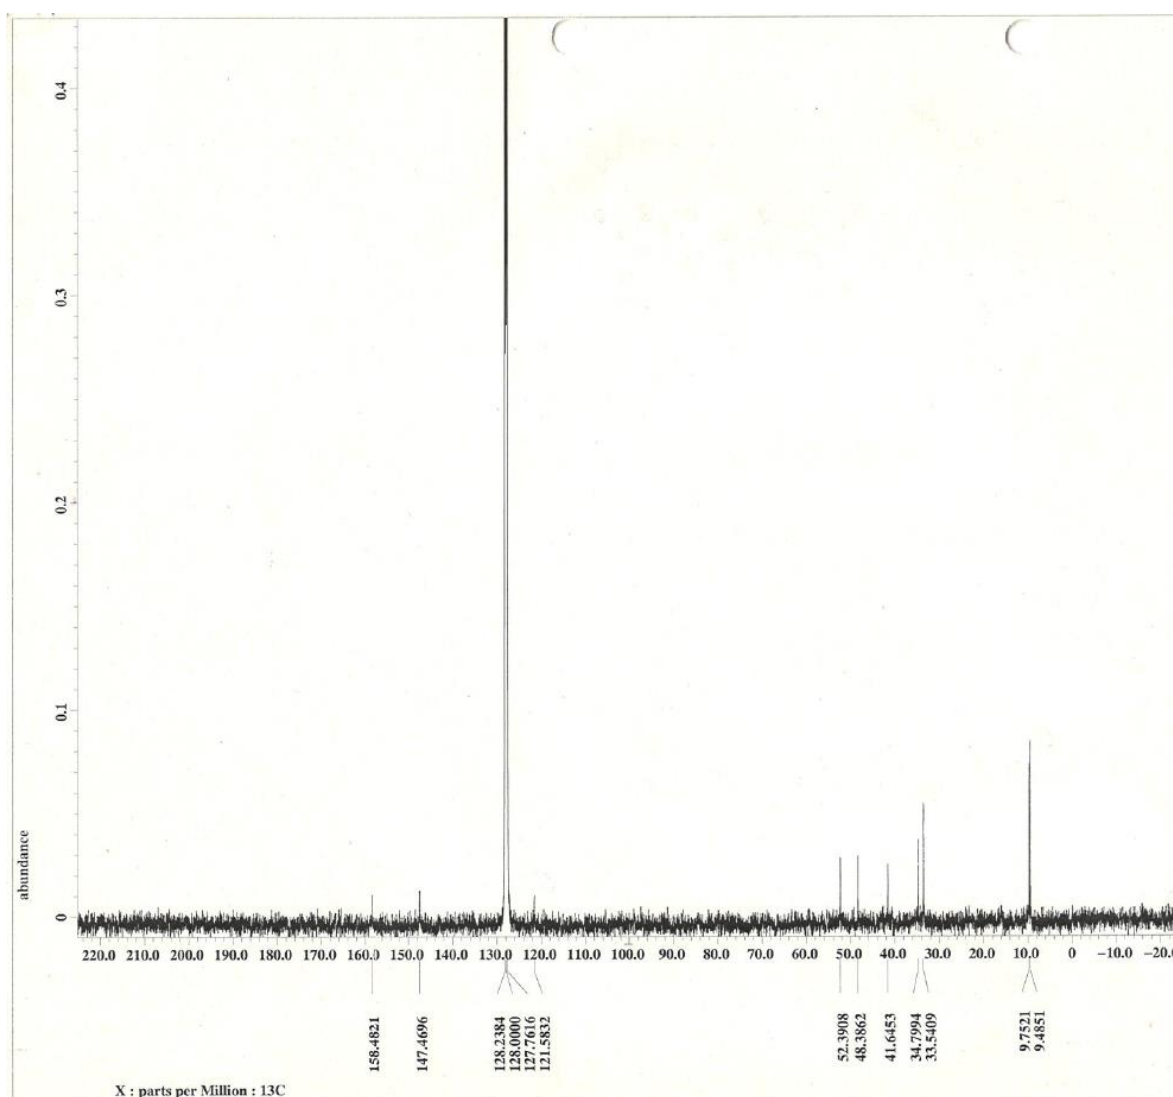

**Figure S13.**  $^{13}\text{C}$  NMR spectrum of  $1\text{-}d_4$  in  $\text{C}_6\text{D}_6$  at  $20^\circ\text{C}$ .

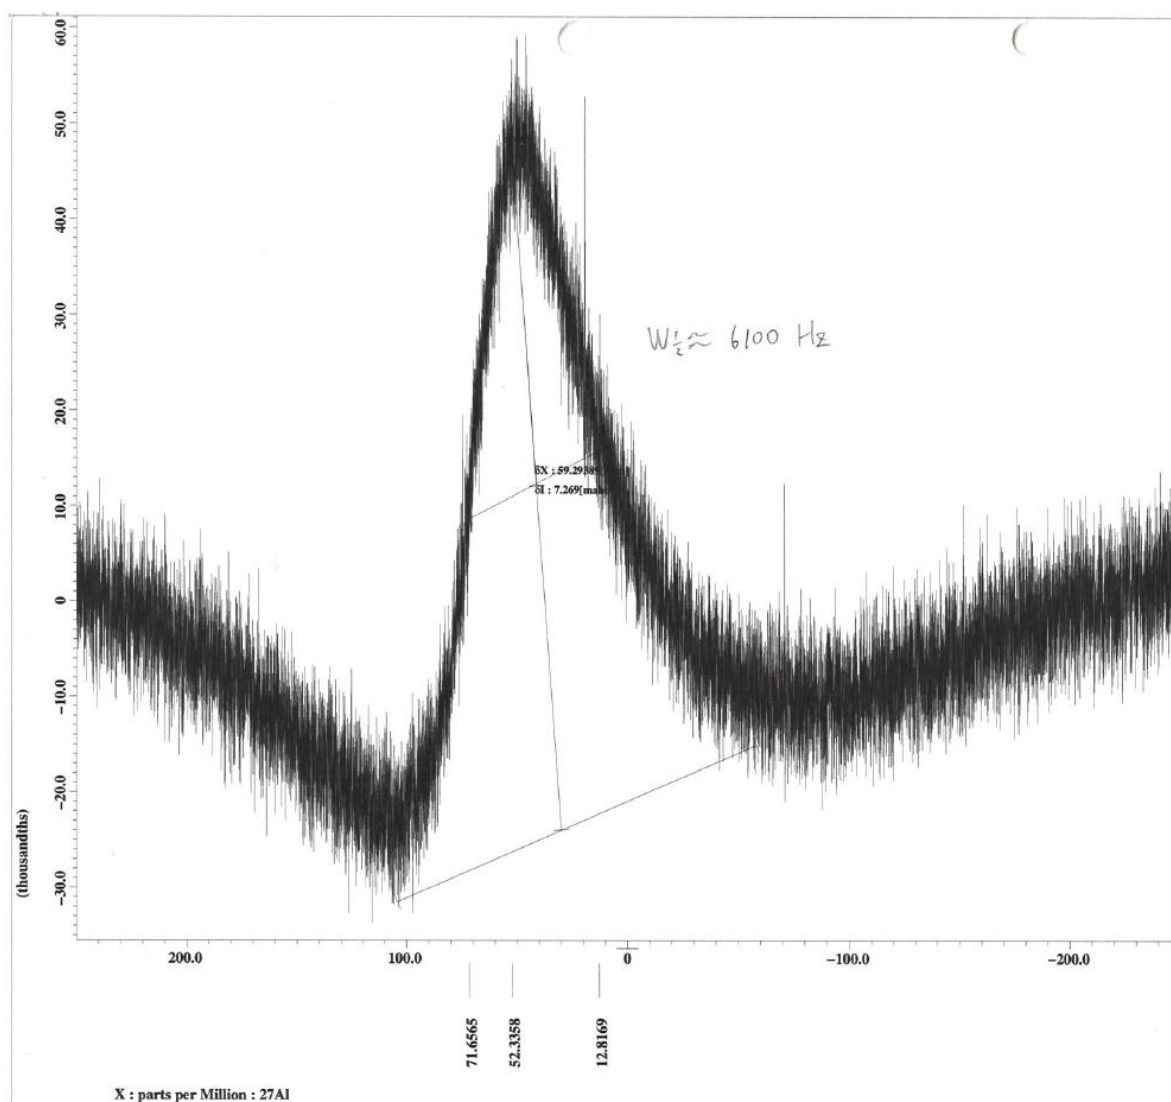

Figure S14.  $^{27}\text{Al}$  NMR spectrum of  $1\text{-d}_4$  in  $\text{C}_6\text{D}_6$  at  $20^\circ\text{C}$ .

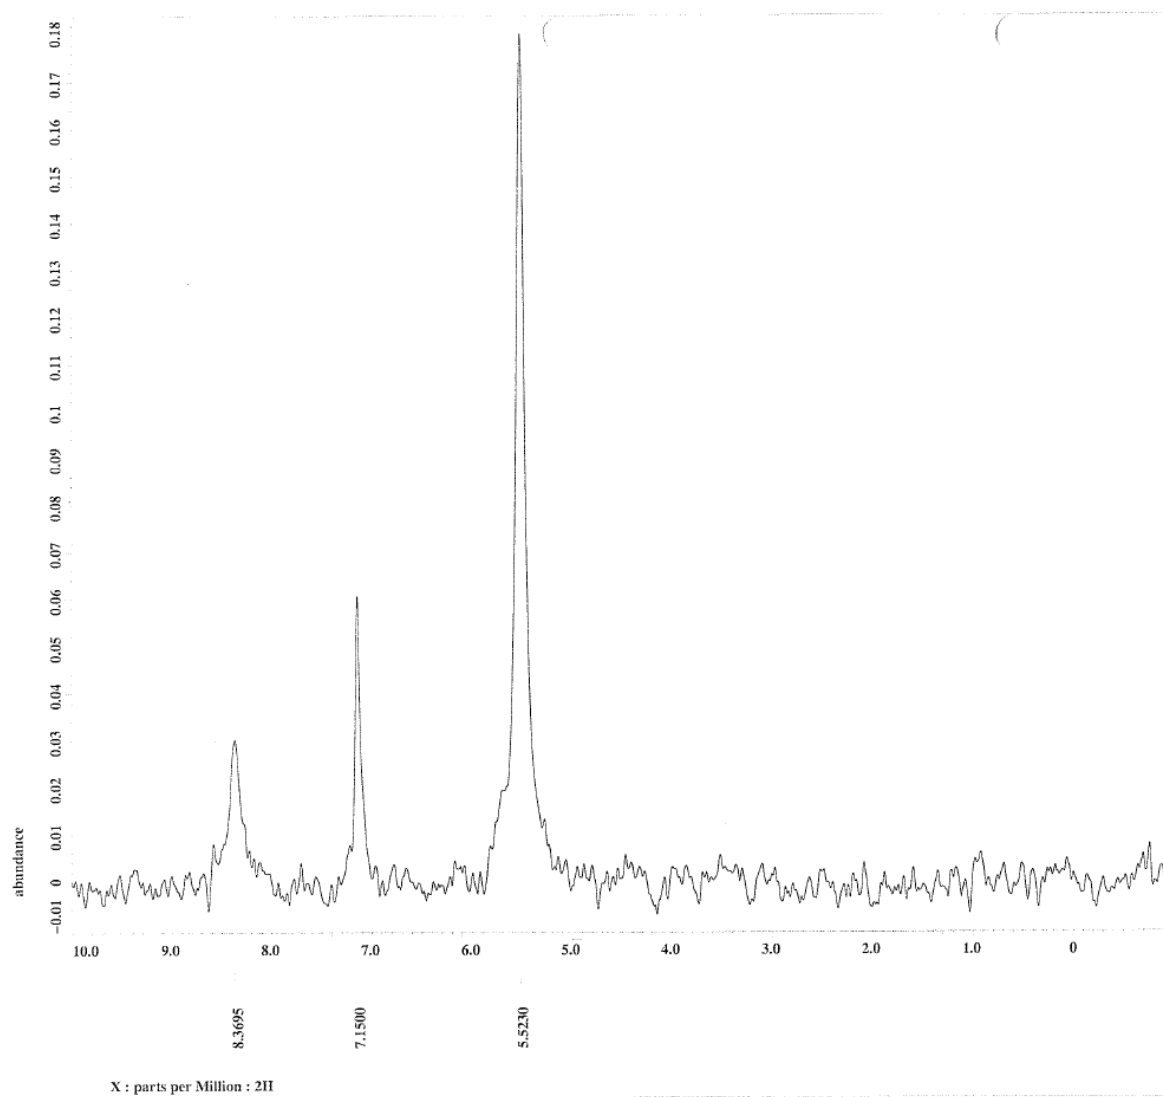

**Figure S15.**  $^2\text{H}$  NMR spectrum of the reaction mixture of **1- $d_4$**  and Py in  $\text{C}_6\text{H}_6$  at 20 °C after 22 h.

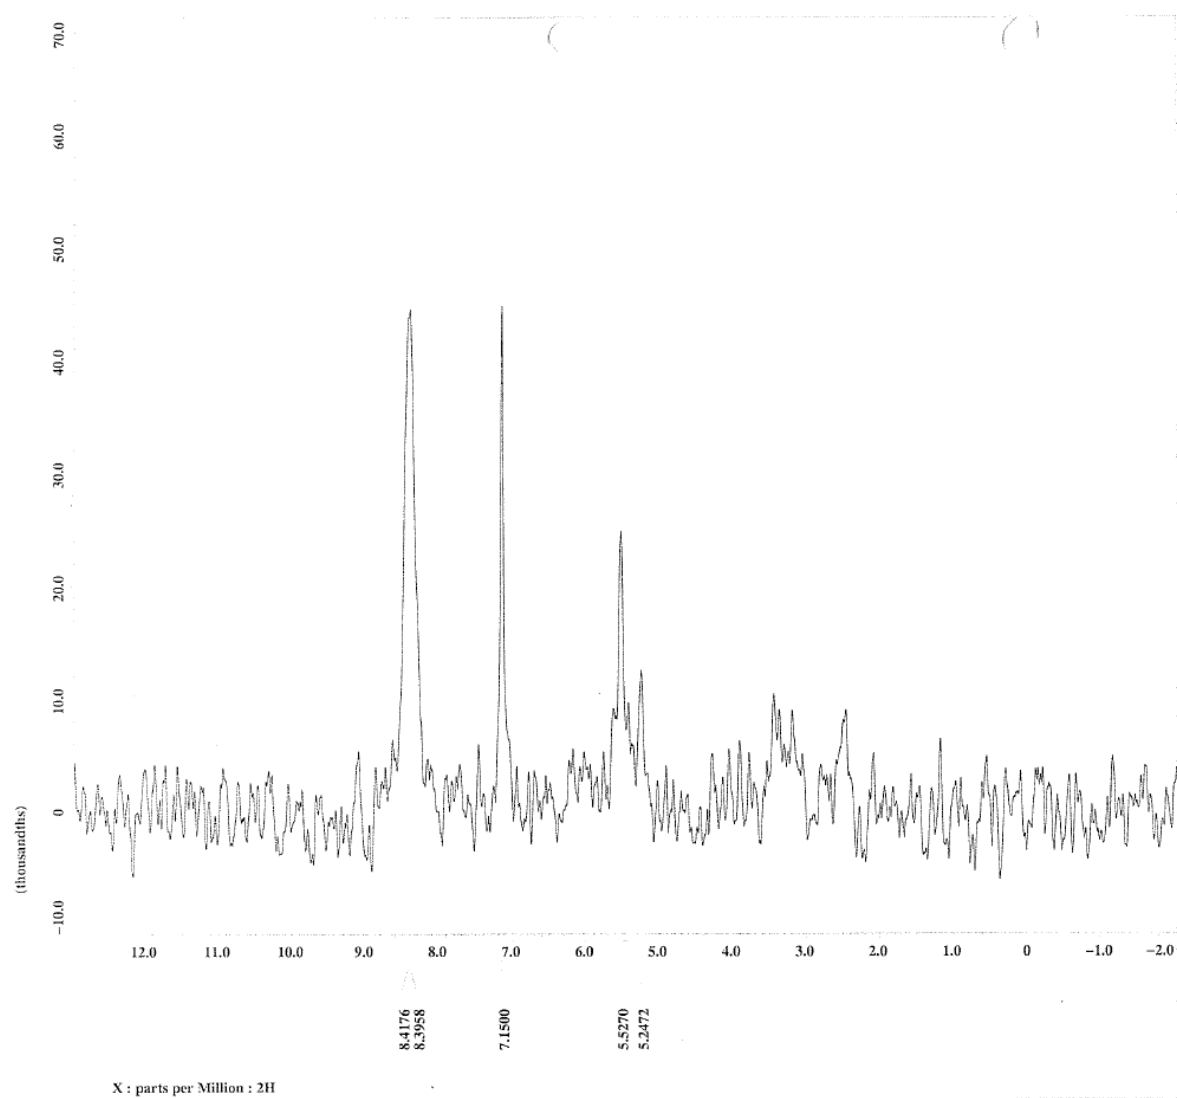

**Figure S16.**  $^2\text{H}$  NMR spectrum of the reaction mixture of **1- $d_4$**  and Py in  $\text{C}_6\text{H}_6$  at 20 °C after 5 days.



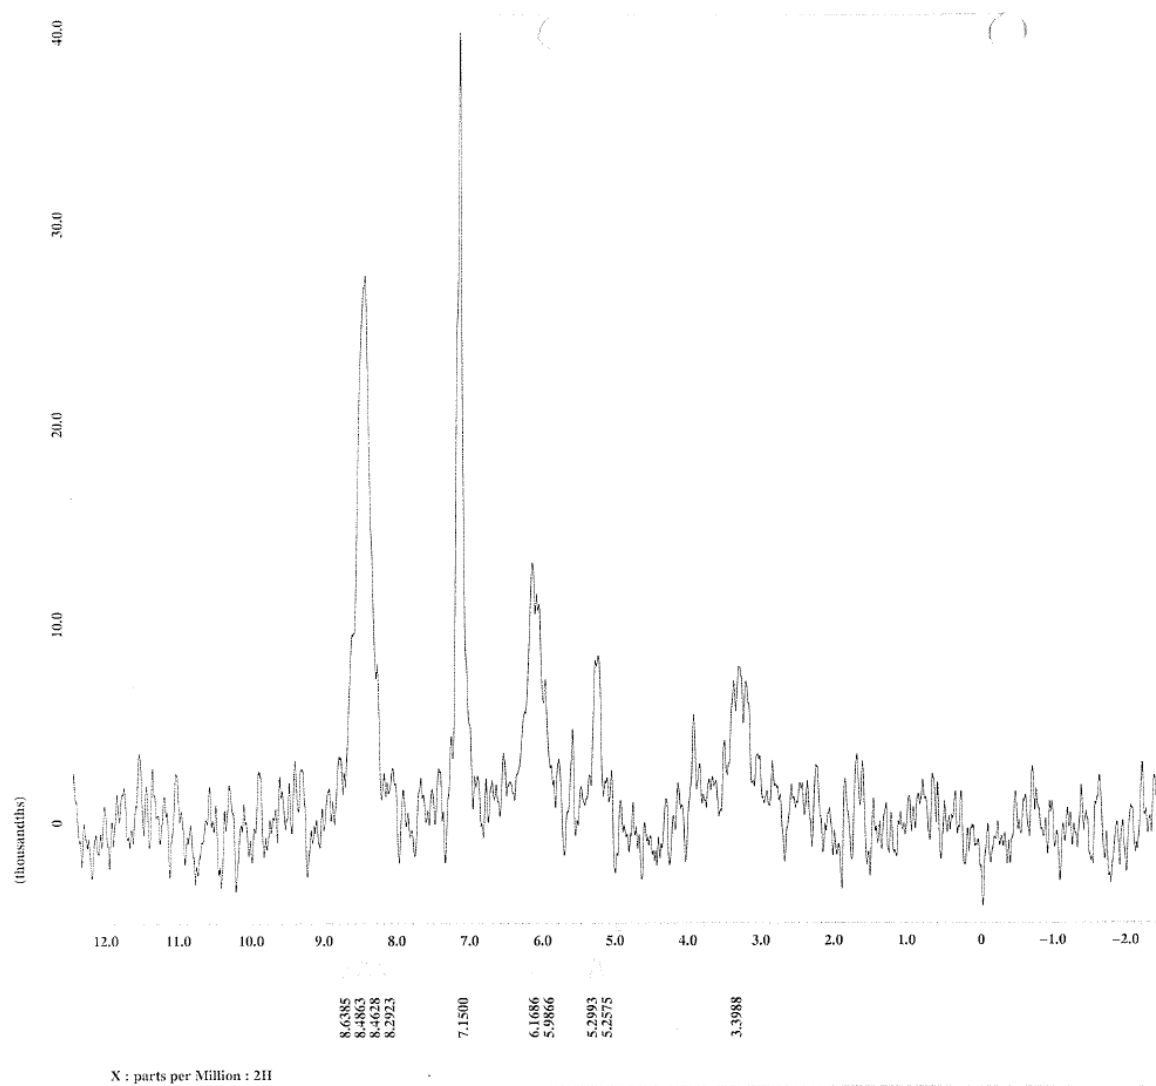

**Figure S17.**  $^2\text{H}$  NMR spectrum of the reaction mixture of **1- $d_4$**  and Py in  $\text{C}_6\text{H}_6$  at 20 °C after 11 days.

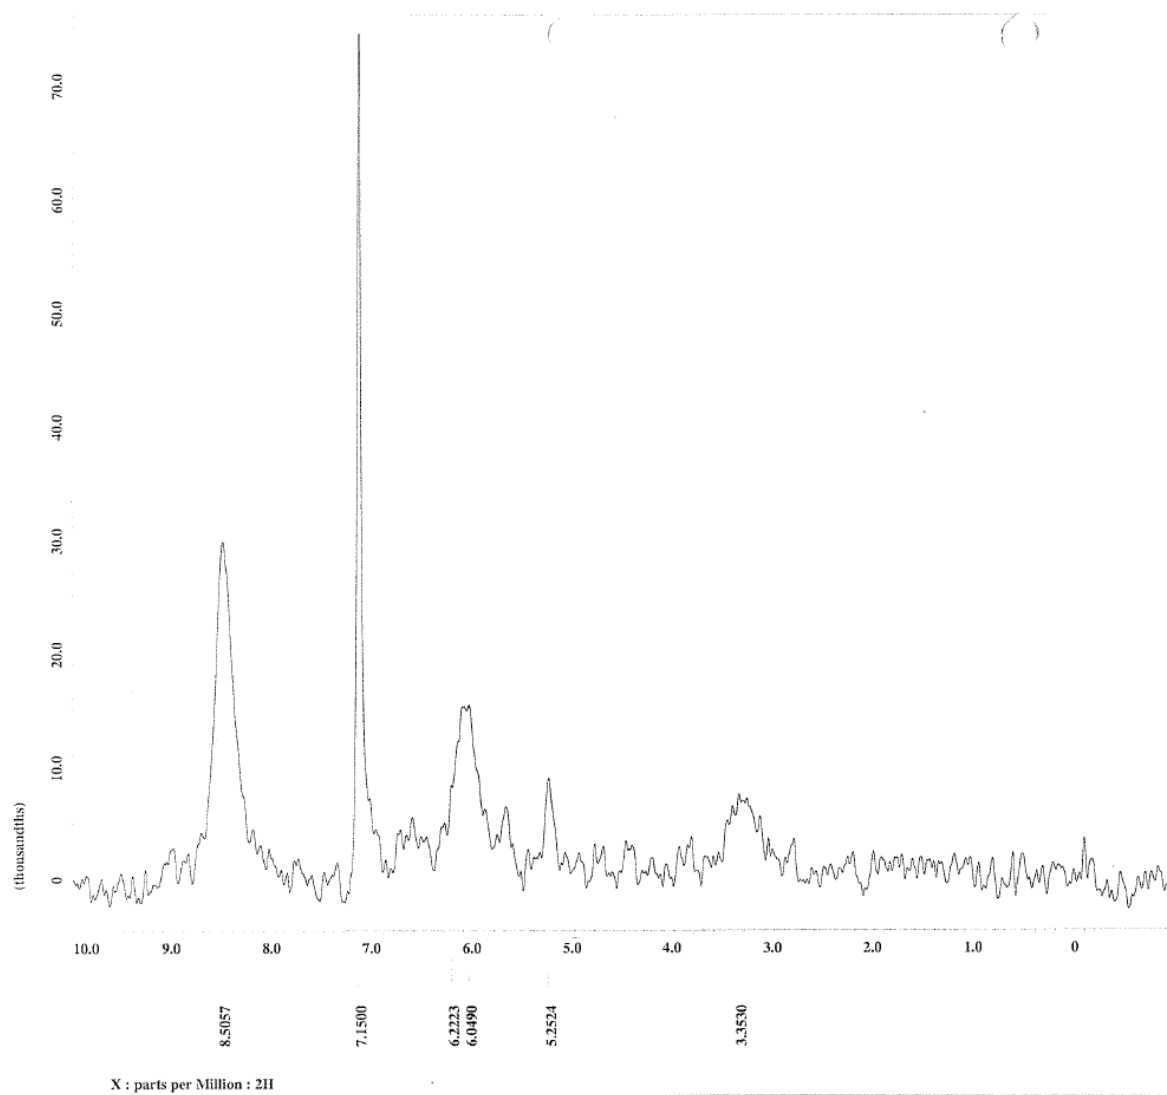

**Figure S18.**  $^2\text{H}$  NMR spectrum of the reaction mixture of **1- $d_4$**  and Py in  $\text{C}_6\text{H}_6$  at 20 °C after 27 days.
